# Supplementary material for: Complete Sequence and Analysis of Coconut Palm (Cocos nucifera) Mitochondrial Genome
Source: PLoS One. 2016 Oct 13;11(10):e0163990. doi: 10.1371/journal.pone.0163990 (PMC5063475; doi:10.1371/journal.pone.0163990)
Supplement: S8 Table — (XLSX) [file pone.0163990.s011.xlsx]

## Sheet: Sheet1
S8 Table. Reads of mt genes in the 8 coconut RNA-Seq datasets
Gene	Health_leaf1	CYD-leaf	Callus	RWDS_leaf	Endosperm	Embryo	Health_leaf2	Leaf_fruit
nad7	224	49	56	108	69	36	81	143
orf135b	0	0	0	1	0	0	1	0
rpl10*	0	0	0	2	0	0	4	0
psbA	114412	6263	1438	6545	696	204	83924	5104
ccmC	41	15	22	34	7	3	6	24
orf119	0	0	1	4	1	4	0	3
orf448*	20	3	13	54	27	6	13	22
petL	1693	67	29	228	19	12	260	124
trnI-GAU	15490	193	655	1144	1043	253	6637	1823
cox2b	884	277	406	2145	310	305	391	2041
nad5	366	63	45	173	60	22	154	245
trnG-GCC	1	1	0	21	0	4	2	63
rps19a	65	11	13	16	2	5	16	93
nad4L	15	0	17	12	4	6	5	13
rps19d	152	95	204	371	173	79	110	3678
rpl5	33	12	36	34	16	14	16	27
trnC-GCA	48	6	10	68	25	8	52	106
trnH-GUG	171	21	42	100	62	18	87	526
trnN-GUU	28	4	17	33	21	8	24	104
orf146-a	1	0	8	21	6	0	5	17
psaJ	896	131	19	212	38	16	373	490
nad6	0	0	0	3	0	0	0	2
rps14a	29	4	28	11	9	9	28	54
atp4	33	8	30	25	18	8	24	53
lhbA	404	21	18	95	6	3	158	92
orf396	2	1	3	6	4	2	14	7
trnG-CGA	1	1	2	2	3	2	15	8
nad3	170	71	63	105	7	3	18	101
rps10	60	25	35	40	29	28	21	112
atp6	107	22	20	60	20	38	29	10
trnQ-UUG	0	0	0	1	0	0	2	2
rpo	0	0	0	0	0	0	1	0
orf110-c*	122	36	62	238	77	44	110	219
matR	53	14	17	37	14	22	63	62
rps13	9	3	16	10	2	6	6	21
rps19b	116	85	183	351	164	76	104	3698
cob	156	19	27	70	21	23	51	53
ccmFn1	35	4	4	15	0	0	11	3
ccmFc	69	59	5	64	42	16	33	58
ccmFn2	43	4	17	38	6	6	14	142
trnR-ACG	5	2	8	34	16	8	13	53
atp9	1036	184	412	708	91	161	253	440
atp8	803	93	483	288	162	65	241	865
petG	292	21	4	77	26	1	147	86
orf113b	0	0	1	9	0	0	0	0
trnE-UUC	2	0	3	7	0	0	2	0
orf103a-2	2	0	0	0	0	0	2	1
rps4	5	3	9	4	1	3	0	8
orf247-ct	360	48	89	258	75	81	196	3775
petB	1143	102	18	91	21	5	788	149
orf120	24	5	7	15	23	15	20	54
cox3	670	178	523	497	202	140	264	794
orf134-a-ct2*	3041	39	188	381	302	65	2038	391
rps11	2	3	6	11	2	4	3	17
trnW-CCA	298	22	15	91	25	1	176	292
orf100b	17	1	9	10	11	7	15	7
trnD-GUC	0	0	0	1	0	1	3	3
rpl16	72	16	34	55	7	16	14	283
nad1	201	81	39	205	80	75	388	287
orf173*	236	48	71	329	291	110	347	1177
rpl14	77	16	3	176	23	36	256	220
orf101b	2	0	1	9	1	1	2	4
orf135e	0	0	10	7	8	6	3	3
orf104*	71	46	37	184	44	19	79	341
ccmB	43	8	20	10	16	12	18	68
trnM-CAU	13	10	7	29	16	2	11	238
orf121-a-ct	188021	15593	7087	30449	3269	836	54092	207720
cox1	1946	492	767	1798	480	541	1149	1364
sdh4	170	41	93	153	45	30	64	78
rps1	22	9	11	10	8	9	8	5978
rps7	121	34	59	70	36	5	61	210
orf115a	179	27	80	192	117	40	72	488
ycf68	15467	257	1514	2021	1699	309	9940	3289
orf222	34	22	65	66	13	9	22	128
trnI-AAU	0	0	0	0	0	0	1	0
orf104a	0	0	0	1	3	0	2	1
rps19c	118	85	183	333	167	73	101	3726
orf159	0	0	0	2	0	0	4	0
orf116*	25	5	6	11	6	4	9	55
trnI-AUA	0	0	0	5	4	0	1	1
rps14b	7346	665	89	361	72	16	3538	3160
trnP-UGG	150	11	26	118	3	7	170	259
orf100	35	14	6	13	31	13	38	44
atp1	3788	661	2760	1638	1124	250	1531	4785
rRNA	7021	154	477	1221	650	317	4898	1148
cox2a	128	52	71	951	86	93	149	701
trnK-UUU	14	2	7	14	5	2	18	16
orf117-c	16	1	6	18	30	13	13	41
orf114	13	1	3	3	4	2	2	14
orf195	23	14	13	58	28	13	63	103
orf101-a	106	51	32	98	68	97	105	193
nad9	76	20	10	23	25	16	11	50
mttB	103	40	29	83	20	17	51	80
orf42	12738	248	962	1580	1078	170	6991	1989
rps12*	47	20	4	9	1	0	3	2
RNA_pol	10	2	4	19	2	2	4	8
trnS-UGA	1197	51	22	127	19	0	853	71
orf161	0	0	3	2	0	0	2	0
trnI-UAU	73	9	9	61	23	5	75	43
trnY-GUA	4	0	1	12	0	0	0	1
orf106	1	0	2	2	0	2	2	12
orf106a*	1	1	31	38	11	16	9	173
orf135a	4	2	12	7	2	2	3	10
trna-UUA	0	0	0	0	0	0	1	0
trnF-GAA	54	1	8	14	7	1	54	100
nad2	378	77	95	207	114	83	141	499
rps19e	20	18	39	136	22	41	22	428
orf490*	21	4	23	11	18	9	12	51
trnS-GCU	12	0	15	31	18	5	15	12
rpl2	78	17	15	30	18	14	9	258
rpl33	126	6	18	79	13	5	216	224
orf115b	25	9	4	26	30	5	61	29
trnT-UGU	37	0	9	18	7	0	17	35
nad4	1034	193	375	1014	304	129	400	963
orf134-a-ct1*	1675	34	132	228	245	49	1388	521
orf111-b	231	53	75	176	153	127	196	44
